# Supplementary material for: MicroRNA-216b targets HK2 to potentiate autophagy and apoptosis of breast cancer cells via the mTOR signaling pathway
Source: PubMed Central journal article supplement (PMC8326127; doi:10.7150/ijbs.48933), 2021-07-13
Supplement: ijbsv17p2970s1.pdf [file ijbsv17p2970s1.pdf]

**Supplementary Table 1** Top 10 BC-related genes were screened out using DisGeNET database

| Gene   | Score | PMIDs |
|--------|-------|-------|
| PIK3CA | 0.280 | 301   |
| BRCA1  | 0.280 | 2228  |
| TP53   | 0.280 | 1099  |
| PTEN   | 0.248 | 173   |
| AKT1   | 0.242 | 152   |
| CHEK2  | 0.236 | 130   |
| FGFR2  | 0.231 | 112   |
| MDM2   | 0.224 | 86    |
| CDH1   | 0.222 | 71    |
| TWIST1 | 0.213 | 47    |

Notes: PIK3CA, Phosphatidylinositol-4, 5-bisphosphate 3-kinase catalytic subunit alpha; BRCA1, breast cancer susceptibility gene 1; TP53, tumor protein p53; PTEN, phosphatase and tensin homolog; AKT1, AKT serine/threonine kinase 1; CHEK2, checkpoint kinase 2; FGFR2, fibroblast growth factor receptor 2; MDM2, murine double minute 2; CDH1, E-cadherin; TWIST1, twist family bHLH transcription factor 1; BC, breast cancer; [PMID: PubMed Unique Identifier](#).

**Supplementary Table 3** Relationships between miR-216b expression, *HK2* mRNA expression and clinicopathological characters of BC patients

| Clinicopathological data | Case       | miR-216b expression | <i>p</i>    | <i>HK2</i> mRNA expression | <i>p</i>    |       |
|--------------------------|------------|---------------------|-------------|----------------------------|-------------|-------|
| Age (years)              |            |                     |             |                            |             |       |
|                          | < 50       | 62                  | 0.37 ± 0.04 | 0.100                      | 1.86 ± 0.21 | 0.100 |
|                          | ≥ 50       | 76                  | 0.37 ± 0.04 |                            | 1.86 ± 0.18 |       |
| Histological type        |            |                     |             |                            |             |       |
|                          | IDC        | 131                 | 0.37 ± 0.04 | 0.516                      | 1.86 ± 0.19 | 0.891 |
|                          | Other type | 7                   | 0.38 ± 0.03 |                            | 1.85 ± 0.12 |       |
| Clinical stage           |            |                     |             |                            |             |       |
|                          | Stage I/II | 85                  | 0.39 ± 0.03 | 0.0001                     | 1.82 ± 0.19 | 0.003 |
|                          | Stage III  | 53                  | 0.33 ± 0.02 |                            | 1.92 ± 0.18 |       |
| LNM                      |            |                     |             |                            |             |       |
|                          | Yes        | 58                  | 0.34 ± 0.03 | 0.0001                     | 1.90 ± 0.19 | 0.034 |
|                          | No         | 80                  | 0.39 ± 0.03 |                            | 1.75 ± 0.16 |       |
| Tumor diameter           |            |                     |             |                            |             |       |
|                          | ≤ 2cm      | 79                  | 0.40 ± 0.02 | 0.0001                     | 1.83 ± 0.19 | 0.030 |
|                          | > 2cm      | 59                  | 0.33 ± 0.02 |                            | 1.90 ± 0.18 |       |

Notes: miR-216b, microRNA-216b; *HK2*, Hexokinase-2; BC, breast cancer; IDC, invasive ductal carcinoma; LNM, lymph node metastasis.

**Supplementary Table 4** Sequences of mimics, inhibitors and siRNAs

| Name               | Sequence                                                                      |
|--------------------|-------------------------------------------------------------------------------|
| miR-216b mimic     | Sense: 5'-AAAUCUCUGCAGGCAAUGUGA-3'<br>Antisense: 5'-ACAUUUGCCUCCAGAGAUUUUU-3' |
| mimic NC           | Sense: 5'-UUCUCCGAACGUGUCACGUTT-3'<br>Antisense: 5'-ACGUGACACGUUCGGAGAATT-3'  |
| miR-216b inhibitor | AAAUCUCUGCAGGCAAUGUGA                                                         |
| Inhibitor NC       | CAGUACUUUUGUGUAGUACAA                                                         |
| siHK2-1            | CCGTAACATTCTCATCGATTT                                                         |
| siHK2-2            | GCTACAAATCAAAGACAAGAA                                                         |

Notes: MiR-216b, microRNA-216b; HK2, Hexokinase-2.

**Supplementary Table 5** Primer sequences for RT-qPCR

| Gene            | Sequence                                                                  |
|-----------------|---------------------------------------------------------------------------|
| <i>MiR-216b</i> | F: 5'-GCCGCGCTAAAGTGCTTATAGTG-3'<br>R: 5'-CACCAGGGTCCGAGGT-3'             |
| <i>HK2</i>      | F: 5'-AAGGCTTCAAGGCATCTG-3'<br>R: 5'-CCACAGGTCATCATAGTTCC-3'              |
| <i>mTOR</i>     | F: 5'-GCTGTACGTTCCCTTCTCCTTC-3'<br>R: 5'-CAAGAACTCGCTGATCCAAATG-3'        |
| <i>Beclin1</i>  | F: 5'-ACCGTGTCACCATCCAGGAA-3'<br>R: 5'-GAAGCTGTTGGCACTTTCTGT-3'           |
| <i>Bax</i>      | F: 5'-CCCGAGAGGTCTTTTTCCGAG-3'<br>R: 5'-CCAGCCCATGATGGTTCTGAT-3'          |
| <i>Bcl-2</i>    | F: 5'-TACAGGCTGGCTCAGGACTAT-3'<br>R: 5'-CGCAACATTTTGTAGCACTCTG-3'         |
| <i>4EBP1</i>    | F: 5' CTAGCCCTACCAGCGATGAG-3'<br>R: 5'-CCTGGTATGAGGCCTGAATG-3'            |
| <i>LC3</i>      | F: 5'-GCACCATGCCGTCGGAGAAGACC-3'<br>R: 5'-CACTCCTAGGTGGGAACACTACTG-3'     |
| <i>MMP-9</i>    | F: 5'-ACGCACGACGTCTTCCAGTAC-3'<br>R: 5'-ACCTGGTTCAACTCACTCCGG-3'          |
| <i>GAPDH</i>    | F: 5'-CATGAGAAGTATGACAACAGCCT-3'<br>R: 5'-AGTCCTTCCACGATACCAAAGT-3'       |
| <i>U6</i>       | F: 5'-GTGCTCGCTTCGGCAGCACATATA-3'<br>R: 5'-AAAAATATGGAACGCTTCACGAATTTG-3' |

Notes: MiR-216b, microRNA-216b; HK2, Hexokinase-2; mTOR, mammalian target of rapamycin; Bcl-2, B-cell lymphoma/leukemia-2; Bax, Bcl-2 Associated X protein; 4EBP1, 4E-binding protein 1; LC3, light chain 3; MMP-9, matrix metalloproteinase-9; GAPDH, glyceraldehyde-3-phosphate dehydrogenase; RT-qPCR, reverse transcription quantitative polymerase chain reaction; F, forward; R, reverse.
